# Supplementary material for: Pt3Co-loaded CdS and TiO2 for photocatalytic hydrogen evolution from water
Source: Royal Society of Chemistry journal article supplement (doi:10.1039/c3ta12407j), 2013-01-01
Supplement: c3ta12407j.pdf [file c3ta12407j.pdf]

Cite this: DOI: 10.1039/c0xx00000x

www.rsc.org/xxxxxx

ARTICLE TYPE

Supplementary Information for

**Pt<sub>3</sub>Co-Loaded CdS and TiO<sub>2</sub> for Photocatalytic Hydrogen Evolution  
 from Water**

Zhuofeng Hu, Jimmy C. Yu\*

Department of Chemistry and Institute of Environment, Energy and Sustainability, The Chinese University of Hong Kong, Shatin, New Territories, Hong Kong, China. Tel.: +852 39436268; fax: +852 26035057. E-mail address: jimyu@cuhk.edu.hk (J.C. Yu).

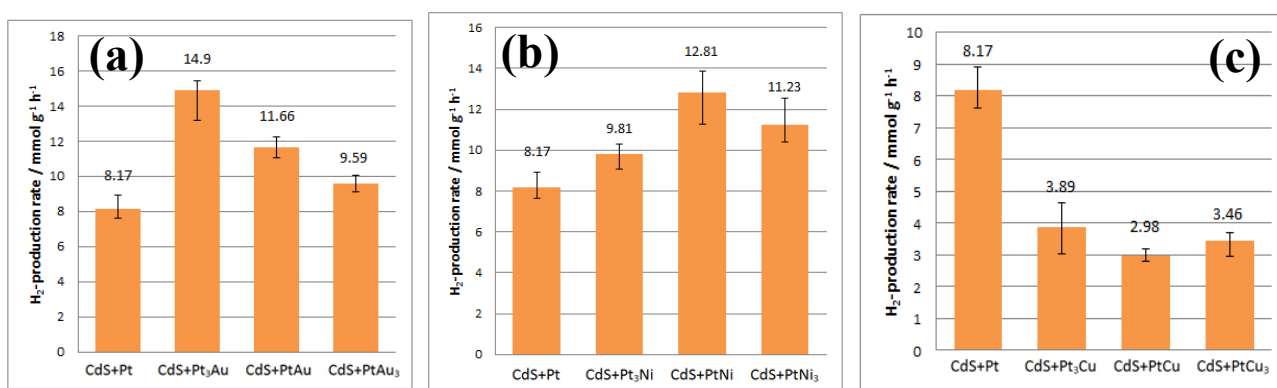

Fig. S1 Comparison of the photocatalytic activities of CdS loaded with different (a) Platinum-gold alloys, (b) Platinum-nickel alloys and (c) Platinum-copper alloys under visible light irradiation (a 300 W xenon lamp with a 420 nm filter). Reaction conditions: 10 mg of photocatalysts, 45 mL of water, 5 mL of lactic acid

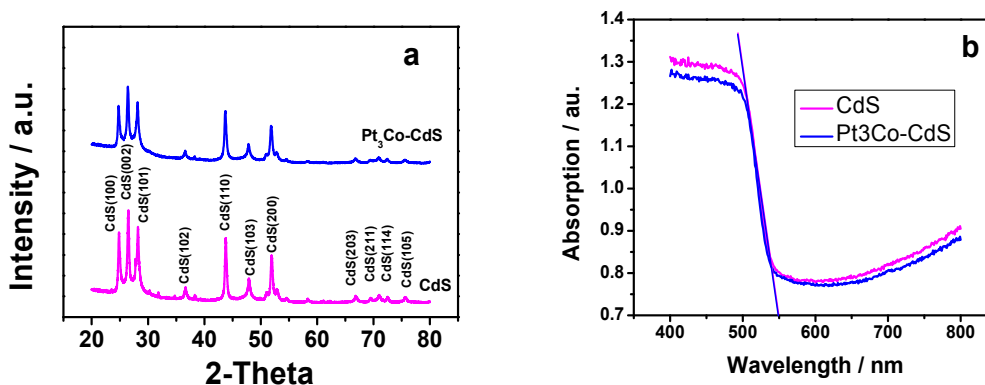

Fig. S2 (a) XRD patterns of CdS and Pt<sub>3</sub>Co-CdS, (b) UV-visible diffuse reflectance spectra of CdS and Pt<sub>3</sub>Co-CdS.

Cite this: DOI: 10.1039/c0xx00000x

www.rsc.org/xxxxxx

ARTICLE TYPE

**Table S1** Photocatalytic hydrogen evolution rates of some CdS loaded with Pt

| Photocatalyst | Synthetic method              | Cocatalyst | Gas production rate (mmol h <sup>-1</sup> g <sup>-1</sup> ) | Reference |
|---------------|-------------------------------|------------|-------------------------------------------------------------|-----------|
| CdS           | photoreduction                | Pt         | 4.5 <sup>1</sup>                                            | 1         |
| CdS           | Ball-milling                  | Pt         | 0.5 <sup>2</sup>                                            | 2         |
| CdS           | chemical precipitation method | Pt         | 0.26 <sup>3</sup>                                           | 3         |
| CdS           | hydrothermal                  | Pt         | 4.0 <sup>4</sup>                                            | 4         |
| CdS           | photoreduction                | Pt         | 4.4 <sup>5</sup>                                            | 5         |
| CdS           | Photoetching                  | Pt         | 1.1 <sup>6</sup>                                            | 6         |
| CdS           | thermal treatment             | Pt         | 0.6 <sup>7</sup>                                            | 7         |

**Table S2** Photocatalytic hydrogen evolution rates of some CdS or TiO<sub>2</sub> loaded with different cocatalyst

| Photocatalyst    | Cocatalyst                    | Gas production rate (mmol h <sup>-1</sup> g <sup>-1</sup> ) | Reference |
|------------------|-------------------------------|-------------------------------------------------------------|-----------|
| CdS              | MoS <sub>2</sub>              | 5.0 <sup>1</sup>                                            | 1         |
| CdS              | MoS <sub>2</sub>              | 13.0 <sup>2</sup>                                           | 2         |
| CdS              | MoS <sub>2</sub>              | 5.5 <sup>8</sup>                                            | 8         |
| CdS              | graphene oxide                | 5.6 <sup>9</sup>                                            | 9         |
| CdS              | N-graphene                    | 1.0 <sup>10</sup>                                           | 10        |
| TiO <sub>2</sub> | MoS <sub>2</sub>              | 1.6 <sup>11</sup>                                           | 11        |
| TiO <sub>2</sub> | MoS <sub>2</sub> and graphene | 2.1 <sup>12</sup>                                           | 12        |
| TiO <sub>2</sub> | Graphene                      | 0.1 <sup>13</sup>                                           | 13        |
| TiO <sub>2</sub> | Graphene                      | 0.75 <sup>14</sup>                                          | 14        |

**Table S3** Photocatalytic hydrogen evolution rates of some heterostructure composites.

| Photocatalyst           | Cocatalyst | Gas production rate (mmol h <sup>-1</sup> g <sup>-1</sup> ) | Reference |
|-------------------------|------------|-------------------------------------------------------------|-----------|
| CdS/TiO <sub>2</sub>    | Pt         | 6.4 <sup>15</sup>                                           | 15        |
| CdS-TiON                | graphene   | 3.0 <sup>16</sup>                                           | 16        |
| CdS-ZnS                 | -          | 4.2 <sup>17</sup>                                           | 17        |
| CdS-ZnS- graphene oxide | -          | 3.75 <sup>18</sup>                                          | 18        |

**Table S4** Photocatalytic hydrogen evolution rates of some ternary or multi-component semiconductors.

| Photocatalyst                                                                 | Cocatalyst | Gas production rate (mmol h <sup>-1</sup> g <sup>-1</sup> ) | Reference |
|-------------------------------------------------------------------------------|------------|-------------------------------------------------------------|-----------|
| CuGa <sub>2</sub> In <sub>3</sub> S <sub>8</sub>                              | Rh         | 10.7 <sup>19</sup>                                          | 19        |
| CdIn <sub>2</sub> S <sub>4</sub>                                              | -          | 6.96 <sup>20</sup>                                          | 20        |
| CuFeO <sub>2</sub> /SnO <sub>2</sub>                                          | -          | 11.6 <sup>21</sup>                                          | 21        |
| TiO <sub>2</sub> /Pt-RuO <sub>2</sub> /8-hydroxyquinoline                     | -          | 8.92 <sup>22</sup>                                          | 22        |
| SiO <sub>2</sub> -HfO <sub>2</sub> -Nb <sub>2</sub> O <sub>5</sub>            | Pt         | 10.8 <sup>23</sup>                                          | 23        |
| Cd <sub>0.1</sub> Cu <sub>0.01</sub> Zn <sub>0.89</sub> S                     | -          | 1.16 <sup>24</sup>                                          | 24        |
| (Zn <sub>0.95</sub> Cu <sub>0.05</sub> ) <sub>0.67</sub> Cd <sub>0.33</sub> S | -          | 3.63 <sup>25</sup>                                          | 25        |

**Table S5.** BET Surface Areas of CdS, Pt-CdS and Pt<sub>3</sub>Co-CdS.

| Photocatalyst          | BET Surface Area (m <sup>2</sup> /g) |
|------------------------|--------------------------------------|
| CdS                    | 16.23                                |
| Pt-CdS                 | 16.41                                |
| Pt <sub>3</sub> Co-CdS | 16.51                                |

Cite this: DOI: 10.1039/c0xx00000x

www.rsc.org/xxxxxx

ARTICLE TYPE

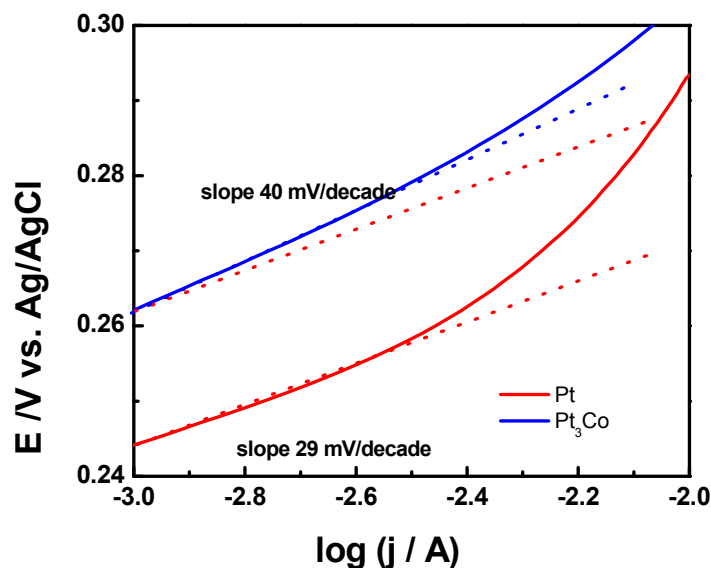

Fig. S3 Tafel plots of Pt nanoparticles and Pt<sub>3</sub>Co nanoparticles recorded on glassy carbon electrodes with a catalyst loading of 0.12 mg/cm<sup>2</sup>.

Electrons transfer between photoexcited semiconductors and metals has been widely studied.<sup>26</sup> In general, if semiconductors and metals are in contact, electrons will transfer between them until the system reaches equilibrium. When n-type semiconductors (such as CdS) and metals (such as Pt, Co) are in contact, electrons move from semiconductors to metals, because the Fermi level of the former is higher than that of the latter. If the n-type semiconductor-metals system (such as CdS-Pt) is illuminated, many photoexcited electrons will be created in CdS, and further transfer to Pt. Such phenomenon is very similar to the transfer of electrons in the process of charging a Pt electrode by applying cathodic bias, because electrons are injected into Pt in the both processes. From this viewpoint, the semiconductor under illumination is just like an “external power supply” for Pt.

For hydrogen evolution reaction at a Pt electrode under negative potential, electrons transfer from external circuits to Pt electrodes, and then combine with the hydrogen ion near the surface of Pt to form H<sub>2</sub>. Similarly, in case of photocatalytic hydrogen evolution, electrons transfer from illuminated semiconductors to Pt, and react with hydrogen ion to form H<sub>2</sub>. As is discussed by Fujishima,<sup>27</sup> the hydrogen evolution sites for photocatalytic decomposition of water are mainly assigned to the loaded metals. Therefore, the final steps of hydrogen evolution on the two occasions are the combination of electrons and hydrogen ion on the surface of metals. Consequently, the surface structure of metals is crucial for hydrogen evolution.

In this work, we attempt to use electrochemical measurements to investigate the mechanism of hydrogen evolution at Pt or Pt<sub>3</sub>Co alloys. Specifically, we study the kinetics of them in 0.5 M H<sub>2</sub>SO<sub>4</sub> solution by using a typical three-electrode system (see the experiment section). Tafel plots of Pt and Pt<sub>3</sub>Co are given in Fig. S1. The linear portions of them were fitted by the Tafel equation  $\eta = b \log j + a$ , where b is the Tafel slope and j is the current density.

H<sub>2</sub> evolution on a metal surface involve the following steps:<sup>28</sup> First, an adsorbed H intermediate (H<sub>ads</sub>) is formed on Metals (M)

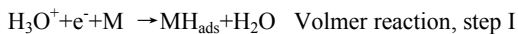

Followed either by an electrochemical desorption step:

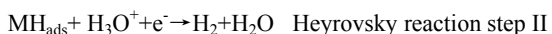

Or a recombination step

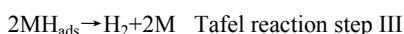

In hydrogen evolution reaction (HER), Tafel slope is determined by the rate-controlling steps. The Tafel slope will be about 120, 40

and 30 mV/decade when the rate-controlling step is Volmer step, Heyrovsky step or Tafel step, respectively.<sup>29</sup>

It has been reported that rate-controlling steps of hydrogen evolution on different metals are not the same. HER on the surface of Pt has been proved to undergo the Volmer-Tafel pathway. The Tafel step is the rate-controlling step in both electrochemical<sup>29</sup> and photocatalytic<sup>27</sup> hydrogen evolution, as can be confirmed by the Tafel slope of Pt electrode in our experiment (30 mV/decade). However, the observed Tafel slope of Pt<sub>3</sub>Co (40 mV/decade) suggests that HER on the surface of Pt<sub>3</sub>Co proceeds different mechanism when compared to that of Pt. As is mentioned by Dai et al.,<sup>29</sup> the 40 mV/decade Tafel slope suggests that Volmer-Heyrovsky mechanism may operate on the surface of Pt<sub>3</sub>Co for hydrogen evolution reaction.

Obviously, alloying Pt with Co results in the change of rate-controlling steps from recombination step to electrochemical desorption step. We assume that Co in the lattice of Pt<sub>3</sub>Co alloy inhibits the recombination of H<sub>ads</sub> adsorbed on the adjacent Pt atoms. Hence, H<sub>ads</sub> are more likely to combine H<sub>3</sub>O<sup>+</sup> in the solution to form H<sub>2</sub> on the surface of Pt<sub>3</sub>Co.

Besides, for other photocatalytic cocatalysts, Volmer-Heyrovsky mechanism was also observed in hydrogen evolution reaction. One typical example is MoS<sub>2</sub>, which has been accepted as an efficient cocatalyst for photocatalytic hydrogen evolution. The working mechanism on MoS<sub>2</sub> is Volmer-Heyrovsky mechanism, as is discussed by Dai's group.<sup>29</sup> Therefore, we propose that Volmer-Heyrovsky mechanism may favor photocatalytic hydrogen evolution reaction. However, due to insufficient data about the Tafel slope of different cocatalysts, further experiments are still required.

## Notes and references

1. X. Zong, H. J. Yan, G. P. Wu, G. J. Ma, F. Y. Wen, L. Wang and C. Li, *J. Am. Chem. Soc.*, 2008, **130**, 7176-+.
2. G. P. Chen, D. M. Li, F. Li, Y. Z. Fan, H. F. Zhao, Y. H. Luo, R. C. Yu and Q. B. Meng, *Appl. Catal. A-Gen.*, 2012, **443**, 138-144.
3. H. Park, W. Choi and M. R. Hoffmann, *J. Mater. Chem.*, 2008, **18**, 2379-2385.
4. Y. X. Li, Y. F. Hu, S. Q. Peng, G. X. Lu and S. B. Li, *J. Phys. Chem. C*, 2009, **113**, 9352-9358.
5. X. Zong, G. P. Wu, H. J. Yan, G. J. Ma, J. Y. Shi, F. Y. Wen, L. Wang and C. Li, *J. Phys. Chem. C*, 2010, **114**, 1963-1968.
6. Y. X. Li, J. Du, S. Q. Peng, D. Xi, G. X. Lu and S. B. Li, *Int. J. Hydrog. Energy*, 2008, **33**, 2007-2013.
7. L. A. Silva, S. Y. Ryu, J. Choi, W. Choi and M. R. Hoffmann, *J. Phys. Chem. C*, 2008, **112**, 12069-12073.
8. X. Zong, H. Yan, G. Wu, G. Ma, F. Wen, L. Wang and C. Li, *Journal of the American Chemical Society*, 2008, **130**, 7176-+.
9. P. Gao, J. C. Liu, S. Lee, T. Zhang and D. D. Sun, *Journal of Materials Chemistry*, 2012, **22**, 2292-2298.
10. L. Jia, D. H. Wang, Y. X. Huang, A. W. Xu and H. Q. Yu, *Journal of Physical Chemistry C*, 2011, **115**, 11466-11473.
11. W. J. Zhou, Z. Y. Yin, Y. P. Du, X. Huang, Z. Y. Zeng, Z. X. Fan, H. Liu, J. Y. Wang and H. Zhang, *Small*, 2013, **9**, 140-147.
12. Q. J. Xiang, J. G. Yu and M. Jaroniec, *Journal of the American Chemical Society*, 2012, **134**, 6575-6578.
13. X. Y. Zhang, H. P. Li, X. L. Cui and Y. H. Lin, *Journal of Materials Chemistry*, 2010, **20**, 2801-2806.
14. W. Q. Fan, Q. H. Lai, Q. H. Zhang and Y. Wang, *Journal of Physical Chemistry C*, 2011, **115**, 10694-10701.
15. H. Fujii, M. Ohtaki, K. Eguchi and H. Arai, *Journal of Molecular Catalysis a-Chemical*, 1998, **129**, 61-68.
16. J. G. Hou, Z. Wang, W. B. Kan, S. Q. Jiao, H. M. Zhu and R. V. Kumar, *Journal of Materials Chemistry*, 2012, **22**, 7291-7299.
17. J. Zhang, J. G. Yu, Y. M. Zhang, Q. Li and J. R. Gong, *Nano Lett.*, 2011, **11**, 4774-4779.
18. Z. Khan, T. R. Chetia, A. K. Vardhaman, D. Barpuzary, C. V. Sastri and M. Qureshi, *RSC Adv.*, 2012, **2**, 12122-12128.
19. H. Kaga, K. Saito and A. Kudo, *Chemical Communications*, 2010, **46**, 3779-3781.
20. B. B. Kale, J.-O. Baeg, S. M. Lee, H. Chang, S.-J. Moon and C. W. Lee, *Advanced Functional Materials*, 2006, **16**, 1349-1354.
21. A. Derbal, S. Omeiri, A. Bouguelia and M. Trari, *International Journal of Hydrogen Energy*, 2008, **33**, 4274-4282.
22. V. H. Houding and M. Gratzel, *Journal of the American Chemical Society*, 1983, **105**, 5695-5696.
23. Y. Ebina, A. Tanaka, J. N. Kondo and K. Domen, *Chemistry of Materials*, 1996, **8**, 2534-2538.
24. G. Liu, L. Zhao, L. Ma and L. Guo, *Catalysis Communications*, 2008, **9**, 126-130.
25. W. Zhang, Z. Zhong, Y. Wang and R. Xu, *Journal of Physical Chemistry C*, 2008, **112**, 17635-17642.
26. V. Subramanian, E. Wolf and P. V. Kamat, *J. Phys. Chem. B*, 2001, **105**, 11439-11446.
27. R. Baba, S. Nakabayashi, A. Fujishima and K. Honda, *J. Phys. Chem.*, 1985, **89**, 1902-1905.
28. B. E. Conway and B. V. Tilak, *Electrochim. Acta*, 2002, **47**, 3571-3594.
29. Y. G. Li, H. L. Wang, L. M. Xie, Y. Y. Liang, G. S. Hong and H. J. Dai, *J. Am. Chem. Soc.*, 2011, **133**, 7296-7299.
